# Supplementary material for: A Pilot Study of Tranilast for Cardiomyopathy of Muscular Dystrophy
Source: PubMed Central journal article supplement — Intern Med. 2017 Nov 1;57(3):311–8. doi: 10.2169/internalmedicine.8651-16 (PMC5827307; doi:10.2169/internalmedicine.8651-16), 2017-11-01
Supplement: 1349-7235-57-0311-s001.pdf [file 1349-7235-57-0311-s001.pdf]

Supplementary table 1. Laboratory data of Pt1

|                                     | pre   | 7th day | 27th day | 55th day | 83th day |
|-------------------------------------|-------|---------|----------|----------|----------|
| <b>UCG</b>                          |       |         |          |          |          |
| LVDd (mm)                           | 65    |         | 65       |          | 66       |
| FS (%)                              | 4     |         | 4        |          | 4        |
| <b>Holter ECG</b>                   |       |         |          |          |          |
| meanHR (bpm)                        | 75    |         | 88       |          | 87       |
| PVC (beats/day)                     | 2891  |         | 7712     |          | 8742     |
| <b>Blood test</b>                   |       |         |          |          |          |
| ANP (pg/mL)                         | 31.8  |         | 29.4     | 32.4     | 19.0     |
| BNP (pg/mL)                         | 144.2 |         | 119.7    | 90.8     | 99.8     |
| cTnT (ng/mL)                        | 0.039 |         | 0.048    | 0.039    | 0.035    |
| CK (U/L)                            | 367   | 445     | 282      | 259      | 343      |
| CK(MB) (%)                          | 3     |         | 3        | 2        | 1        |
| cystatin C (ng/mL)                  | 1.32  |         | 1.36     | 1.17     | 1.22     |
| BUN (mg/dL)                         | 23.6  | 23.7    | 16.4     | 18.5     | 20.4     |
| Crn (mg/dL)                         | 0.34  | 0.36    | 0.37     | 0.34     | 0.33     |
| UA (mg/dL)                          | 8.5   | 4.4     | 4.5      | 4.4      | 4.5      |
| Na (mEq/L)                          | 133   | 136     | 135      | 132      | 133      |
| K (mEq/L)                           | 2.9   | 2.6     | 2.9      | 2.9      | 3.3      |
| Cl (mEq/L)                          | 93.3  | 94.9    | 92.4     | 93.2     | 91.9     |
| AST (U/L)                           | 34    | 32      | 28       | 37       | 32       |
| ALT (U/L)                           | 36    | 31      | 24       | 37       | 30       |
| $\gamma$ -GTP (U/L)                 | 90    | 73      | 47       | 101      | 49       |
| LDH (U/L)                           | 204   |         | 249      | 238      | 220      |
| T.Bil (mg/dL)                       | 0.40  | 0.40    | 0.61     | 0.69     | 0.65     |
| RBC ( $\times 10^6$ cells/ $\mu$ L) | 393   | 386     | 396      | 389      | 405      |
| Hg (g/dL)                           | 13.2  | 13.1    | 13.3     | 13.1     | 13.7     |
| Ht (%)                              | 37.9  | 37.1    | 37.7     | 37.6     | 39.2     |
| Plt ( $\times 10^4$ cells/ $\mu$ L) | 14.0  | 16.5    | 16.4     | 14.4     | 16.1     |
| WBC (cells/ $\mu$ L)                | 7650  | 8190    | 5880     | 7400     | 5850     |
| Eo (cells / $\mu$ L)                | 210   | 190     | 460      | 280      | 210      |
| CRP (mg/dL)                         | 0.19  | 0.21    | 0.84     | 0.19     | 0.21     |
| PT-INR                              | 2.25  | 3.64    | 1.48     | 2.59     | 2.48     |
| TGF- $\beta$ 1 (ng/mL)              | 13.3  |         | 2.5      |          | 16.3     |

---

**Urinalysis**

|              |   |   |   |   |
|--------------|---|---|---|---|
| Protein      | - | - | - | - |
| Sugar        | - | - | - | - |
| Occult blood | - | - | - | - |

---
