# Supplementary material for: A Pilot Study of Tranilast for Cardiomyopathy of Muscular Dystrophy
Source: PubMed Central journal article supplement — Intern Med. 2017 Nov 1;57(3):311–8. doi: 10.2169/internalmedicine.8651-16 (PMC5827307; doi:10.2169/internalmedicine.8651-16), 2017-11-01
Supplement: 1349-7235-57-0311-s002.pdf [file 1349-7235-57-0311-s002.pdf]

Supplementary table 2. Laboratory data of Pt2

|                     | pre   | 25th<br>day | 27th<br>day | 32nd<br>day | 34th<br>day | 49th<br>day | 50th<br>day | 53rd<br>day | 55th<br>day | 60th<br>day | 64th<br>day | 68th<br>day | 77th<br>day | 83rd<br>day | 88th<br>day |
|---------------------|-------|-------------|-------------|-------------|-------------|-------------|-------------|-------------|-------------|-------------|-------------|-------------|-------------|-------------|-------------|
| <b>UCG</b>          |       |             |             |             |             |             |             |             |             |             |             |             |             |             |             |
| LVDd (mm)           | 61    |             | 61          |             |             |             |             |             |             |             |             |             |             | 60          |             |
| FS (%)              | 6     |             | 6           |             |             |             |             |             |             |             |             |             |             | 6           |             |
| <b>Holter ECG</b>   |       |             |             |             |             |             |             |             |             |             |             |             |             |             |             |
| meanHR (bpm)        | 76    |             | 68          |             |             |             |             |             |             |             |             |             |             | 78          |             |
| PVC (beats/day)     | 1206  |             | 1033        |             |             |             |             |             |             |             |             |             |             | 1153        |             |
| <b>Blood test</b>   |       |             |             |             |             |             |             |             |             |             |             |             |             |             |             |
| ANP (pg/mL)         | 46.7  |             | 28.5        |             |             | 68.7        |             |             | 38.2        |             |             |             | 49.4        | 32.3        |             |
| BNP (pg/mL)         | 164.3 | 135.1       | 102.6       | 98.0        | 133.9       | 154.0       | 64.5        | 143.4       | 151.3       | 188.0       | 228.3       | 195.5       | 114.6       | 171.9       | 111.8       |
| cTnT (ng/mL)        | 0.016 |             | 0.029       |             |             | 0.047       |             | 0.056       | 0.043       |             |             |             | 0.038       | 0.025       |             |
| CK (U/L)            | 225   |             | 176         | 211         | 257         | 265         | 248         | 210         | 536         | 352         | 195         | 185         | 95          | 399         | 187         |
| CK(MB) (%)          | 1     |             | 2           |             |             |             |             |             | 1           |             |             |             |             | 2           |             |
| cystatin C (ng/mL)  | 0.92  |             | 1.77        |             | 2.27        | 2.86        |             | 2.48        | 2.46        |             |             |             | 2.61        | 1.70        |             |
| BUN (mg/dL)         | 14.0  | 24.2        | 30.7        | 38.4        | 47.8        | 48.0        | 51.4        | 26.6        | 23.9        | 14.7        | 6.7         | 6.6         | 26.7        | 23.7        | 45.0        |
| Crn (mg/dL)         | 0.14  | 0.23        | 0.27        | 0.26        | 0.31        | 0.54        | 0.74        | 0.64        | 0.63        | 0.26        | 0.26        | 0.22        | 0.39        | 0.21        | 0.26        |
| UA (mg/dL)          |       |             |             | 3.5         | 4.1         | 9.1         | 8.6         | 7.2         | 6.3         | 6.0         | 6.1         | 6.8         | 5.8         |             | 6.3         |
| Na (mEq/L)          | 137   | 135         | 136         |             | 137         | 133         | 134         | 137         | 130         | 140         | 136         | 137         | 134         | 134         | 134         |
| K (mEq/L)           | 3.5   | 4.0         | 4.1         |             | 4.1         | 3.4         | 3.8         | 4.4         | 4.3         | 4.1         | 3.6         | 3.6         | 3.7         | 3.9         | 4.0         |
| Cl (mEq/L)          | 103.3 |             | 98.6        |             |             | 94.4        | 96.0        |             | 100.2       | 105.3       | 102.2       | 104.3       | 97.0        | 100.5       | 100.6       |
| AST (U/L)           | 18    | 40          | 60          | 209         | 152         | 22          | 21          | 19          | 24          | 24          | 23          | 35          | 19          | 34          | 30          |
| ALT (U/L)           | 17    | 30          | 61          | 265         | 264         | 30          | 26          | 20          | 18          | 27          | 31          | 54          | 29          | 35          | 40          |
| $\gamma$ -GTP (U/L) | 35    | 53          | 54          | 61          | 57          | 40          | 35          | 39          | 41          | 51          | 41          | 38          | 37          | 36          | 37          |
| LDH (U/L)           | 160   | 221         | 211         | 350         | 241         | 164         | 156         |             | 169         | 186         | 170         | 173         | 190         | 159         | 171         |
| T.Bil (mg/dL)       | 0.46  | 0.59        | 0.68        | 0.73        | 0.82        | 0.79        | 0.90        | 1.12        | 0.88        | 0.53        | 0.36        | 0.42        | 0.83        | 0.39        | 0.60        |

|                                     |       |      |      |      |      |      |      |      |      |      |      |      |       |      |      |
|-------------------------------------|-------|------|------|------|------|------|------|------|------|------|------|------|-------|------|------|
| RBC ( $\times 10^6$ cells/ $\mu$ L) | 414   | 414  | 407  | 395  | 388  | 388  | 313  | 341  | 274  | 325  | 333  | 349  | 326   | 318  | 327  |
| Hg (g/dL)                           | 12.6  | 12.0 | 12.0 | 11.7 | 11.4 | 11.8 | 9.5  | 10.4 | 8.4  | 9.8  | 10.4 | 10.9 | 10.5  | 10.3 | 10.5 |
| Ht (%)                              | 36.9  | 35.3 | 35.3 | 34.2 | 33.5 | 34.5 | 27.4 | 30.9 | 24.8 | 29.4 | 30.5 | 32.3 | 31.4  | 30.3 | 31.0 |
| Plt ( $\times 10^4$ cells/ $\mu$ L) | 22.2  | 28.9 | 28.9 | 23.6 | 21.5 | 19.4 | 20.5 | 18.0 | 20.1 | 30.2 | 28.6 | 28.5 | 27.8  | 31.7 | 32.0 |
| WBC (cells/ $\mu$ L)                | 10480 | 5330 | 5050 | 4510 | 7330 | 5180 | 6990 | 8750 | 9790 | 5630 | 4190 | 5770 | 10490 | 6620 | 5200 |
| Eo (cells / $\mu$ L)                | 250   | 340  | 360  | 390  | 450  | 480  | 380  | 400  | 350  | 370  | 380  | 530  | 470   | 670  | 620  |
| CRP (mg/dL)                         | 5.29  | 1.71 | 0.87 | 0.32 | 2.05 | 0.24 | 0.92 | 2.78 | 7.45 | 1.61 | 0.52 | 0.13 | 7.41  | 0.86 | 0.15 |
| PT-INR                              | 1.18  |      | 1.28 |      |      |      |      |      | 1.25 |      |      |      |       | 1.13 |      |
| TGF- $\beta$ 1 (ng/mL)              | 14.0  |      | 7.2  |      |      |      |      |      |      |      |      |      |       | 26.0 |      |
| <b>Urinalysis</b>                   |       |      |      |      |      |      |      |      |      |      |      |      |       |      |      |
| Protein                             | +/-   |      | +/-  | -    |      |      | 1+   |      | -    |      |      |      |       |      | 1+   |
| Sugar                               | -     |      | -    | -    |      |      | -    |      | -    |      |      |      |       |      | -    |
| Occult blood                        | -     |      | -    | -    |      |      | -    |      | -    |      |      |      |       |      | -    |
